# Supplementary material for: High Angiotensin-Converting Enzyme and Low Carboxypeptidase N Serum Activity Correlate with Disease Severity in COVID-19 Patients
Source: MDPI journal article supplement (doi:10.3390/jpm12030406), 2022-03-05
Supplement: s1 [file s1]

# High Angiotensin-Converting Enzyme and Low Carboxypeptidase N Serum Activity Correlate with Disease Severity in COVID-19 Patients

Supplementary materials:

**Table S1.** ACE2 and viral infection (assembled from [1, 2, 3] and references therein).

| <b>ACE2 is functional receptor for SARS-CoV-2, required for host cell entry and subsequent viral replication</b> |  |
|------------------------------------------------------------------------------------------------------------------|--|
| ACE2 is mainly expressed by epithelial cells of lung, intestine, kidney, blood vessels, mucosa of oral cavity    |  |
| Coronaviruses down-regulate ACE2 and thus its anti-inflammatory actions                                          |  |
| Membrane-bound ACE2 is shed in COVID-19 infection, acute lung injury, myocardial infarction                      |  |
| Circulating ACE2 protects against influenza A virus induced acute lung injury                                    |  |
| Turning off ACE2 gene causes severe lung damage in influenza-infected mice                                       |  |
| Treating mice with human ACE2 dampens lung injury                                                                |  |
| Higher serum ACE2 levels in patients with better outcomes in influenza A induced lung injury                     |  |

**Table S2.** ACE / ACE2-related factors relevant in COVID-19 progression (assembled from [1, 2, 3] and references therein).

|                | <b>ACE / ACE2</b>                                                                                                              | <b>COVID-19</b>                                                                                                                                                    |
|----------------|--------------------------------------------------------------------------------------------------------------------------------|--------------------------------------------------------------------------------------------------------------------------------------------------------------------|
| Children       | Children and adolescents have higher ACE and ACE2 levels in serum than adults                                                  | <i>Symptomatic</i> COVID-19 in children and young adults uncommon (~1% < 19 y), disease progression less severe than in adults                                     |
|                | ACE2 levels and activity (urine, plasma, placenta) increase in pregnancy (protein can pass through the placenta)               | Younger mice more resistant to infection, more severe disease in older animals                                                                                     |
| Gender         | Estrogens participate in upregulation of ACE2 expression and activity, estradiol is modulator of ACE/ACE2 and AT1/AT2 receptor | No significant gender difference in disease progression in young patients                                                                                          |
|                | Females have two ACE2 alleles and a greater range of phenotypes                                                                | Female mortality about half that of males, higher survival of females independent of older age                                                                     |
|                | Some ACE genotypes have twice the ACE activity than others                                                                     | Men more likely to have more severe pathophysiological expression of the disease                                                                                   |
|                | Males have only one X-linked ACE2 allele, thus, are more vulnerable to phenotypes causing impaired ACE2 regulation             |                                                                                                                                                                    |
|                | Serum ACE2 levels lower in females                                                                                             |                                                                                                                                                                    |
| Age            | Higher tissue ACE2 levels in Asian females compared to males and other ethnic groups                                           |                                                                                                                                                                    |
|                | ACE2 expression decreases with age                                                                                             | Death rate increases with age and co-morbidities (cardiovascular disease, diabetes, hypertension - "metabolic syndrome")                                           |
| Co-morbidities | Significant decrease in ACE2 expression in type II diabetes                                                                    | More severe course with pre-existing cardiovascular disease                                                                                                        |
|                | Higher plasma ACE2 in advanced heart failure correlate with worsening clinical status                                          | Higher levels of cardiac troponin correlate with more severe disease                                                                                               |
|                | Serum ACE2 levels higher in hypertensive patients (up to 50% greater in males)                                                 | Serum Ang II levels elevated, correlate with viral load and lung injury                                                                                            |
|                | Pre-existing hypertension correlates with greater frequency of ACE2 polymorphisms                                              | Patients with severe disease present features consistent with unopposed RAS activity (higher blood pressure, lower serum potassium levels, high urinary potassium) |

**References:**

1. Arnold, R.G. COVID-19—Does this disease kill due to imbalance of the renin angiotensin system (RAS) caused by genetic and gender differences in the response to viral ACE2 attack? *Heart Lung Circ.* **2020**, *29*, 964–972.
2. Ciaglia, E.; Vecchione, C.; Puca, A.A. COVID-19 infection and circulating ACE2 Levels: Protective role in women and children. *Front. Pediatr.* **2020**, *8*, 206.
3. Skarstein Kolberg, E. ACE2, COVID19 and serum ACE as a possible biomarker to predict severity of disease. *J. Clin. Virol.* **2020**, *126*, 104350.
